# Supplementary material
Source: PubMed Central journal article supplement (PMC3593812)

Chromosome 1

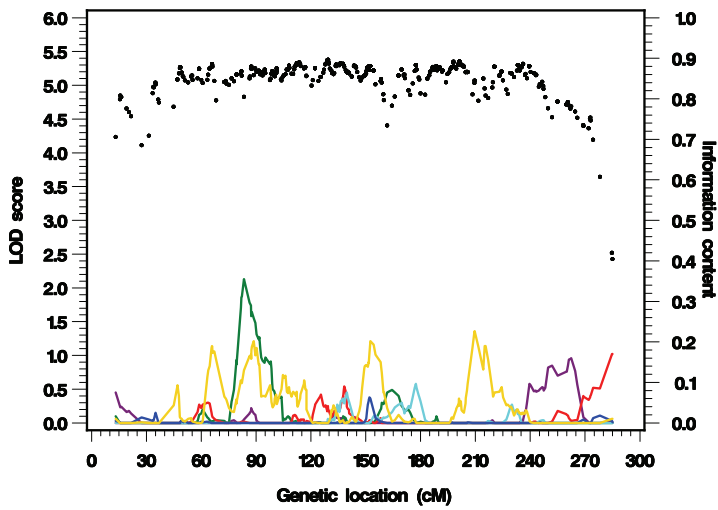

Chromosome 2

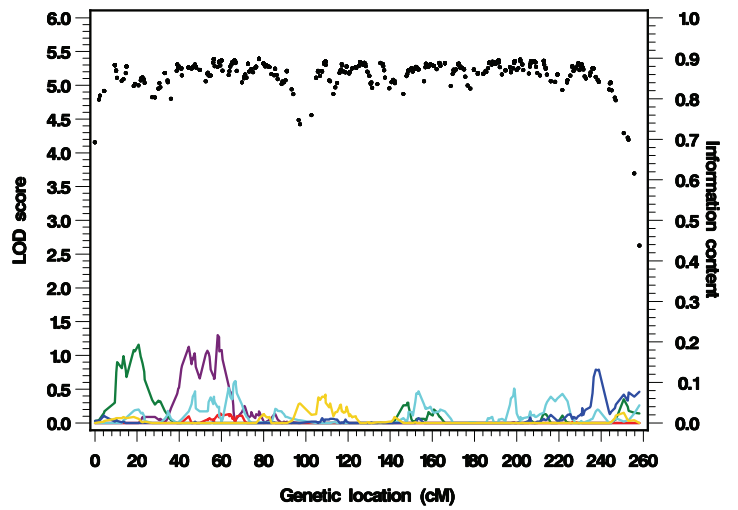

Chromosome 3

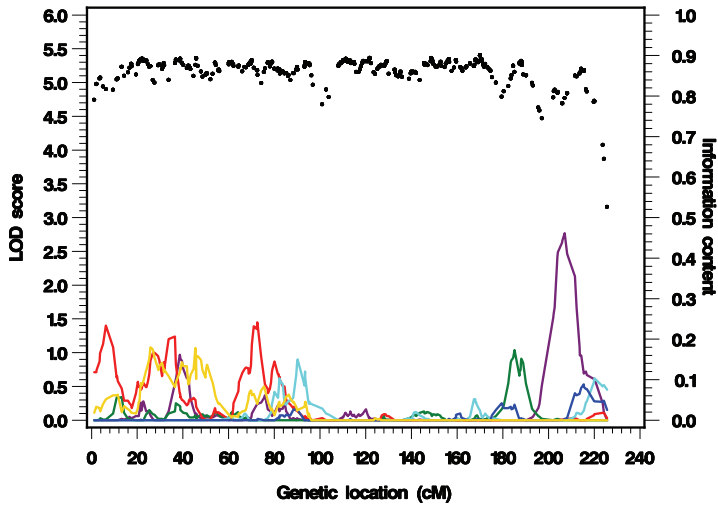

Chromosome 4

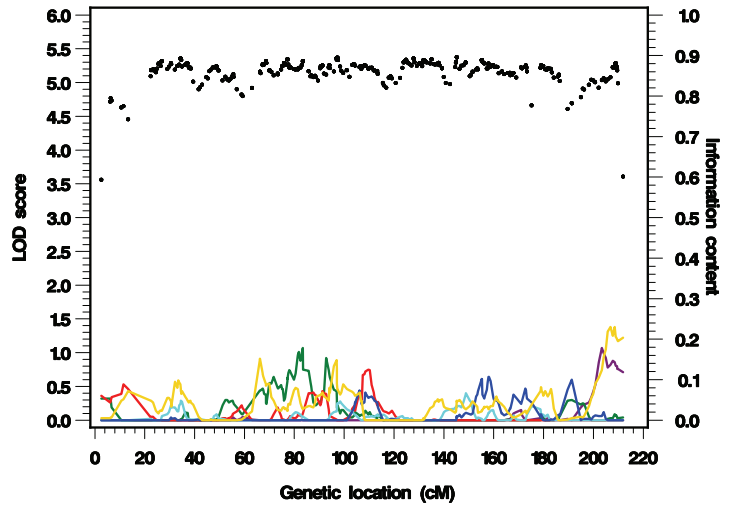

Chromosome 5

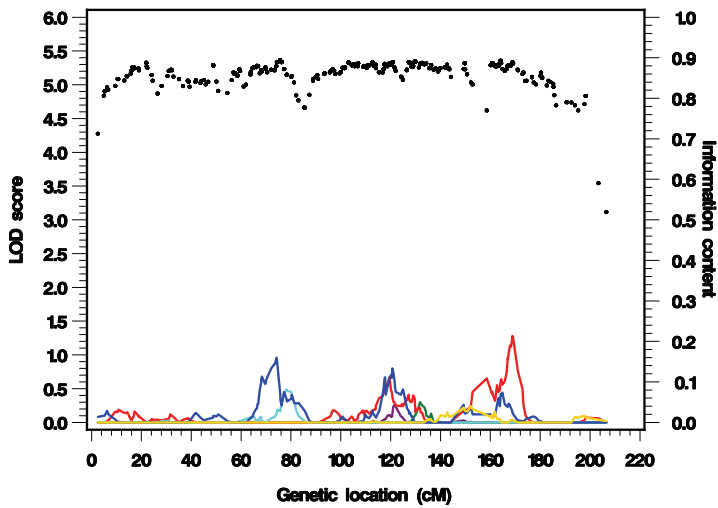

Chromosome 6

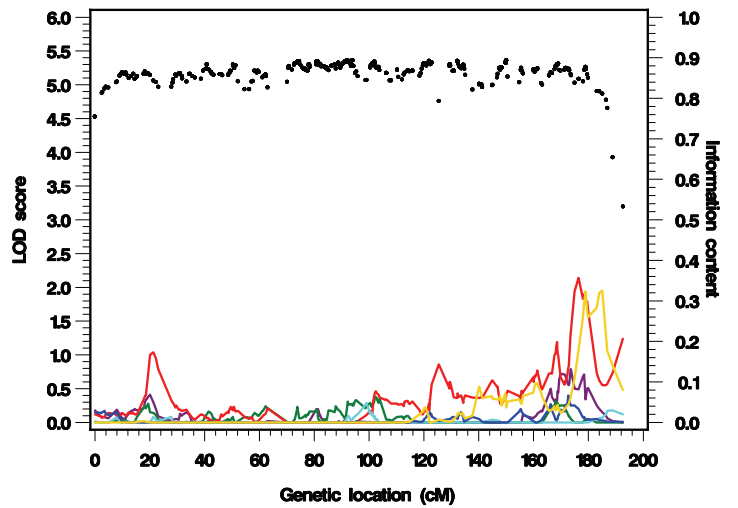

Chromosome 7

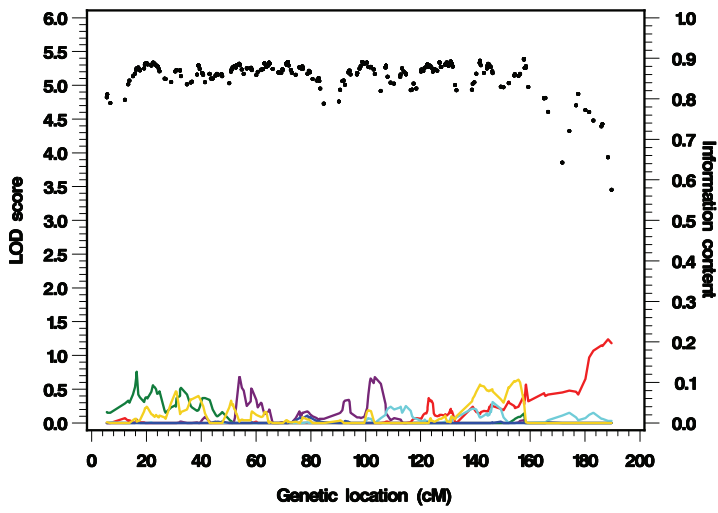

Chromosome 8

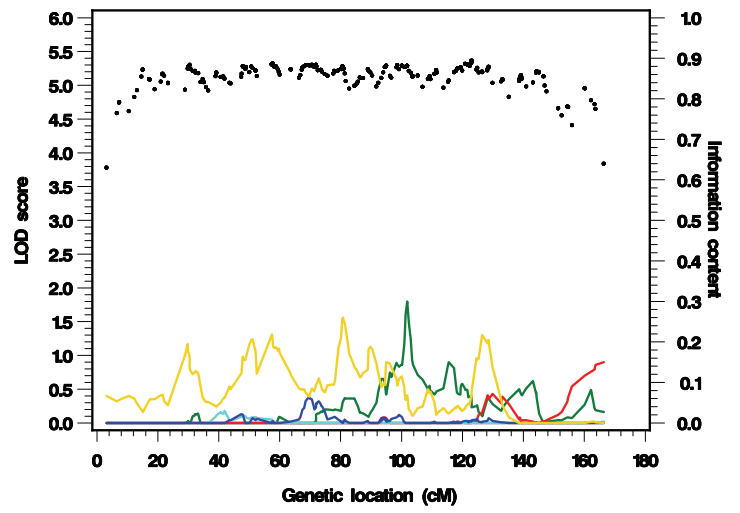

Chromosome 9

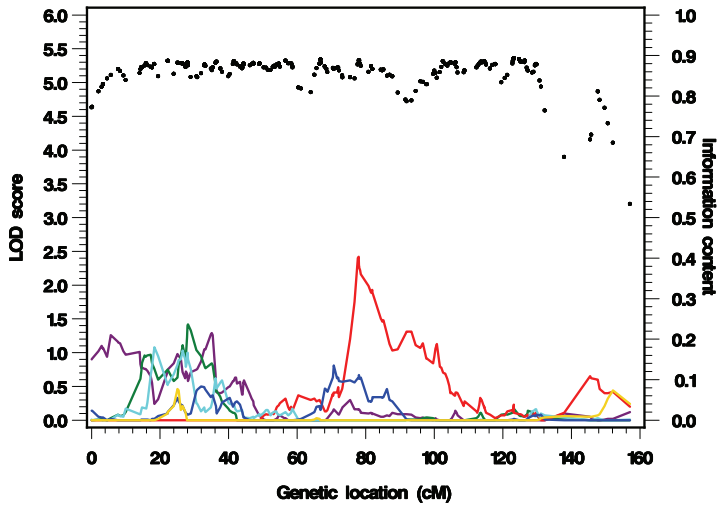

Chromosome 10

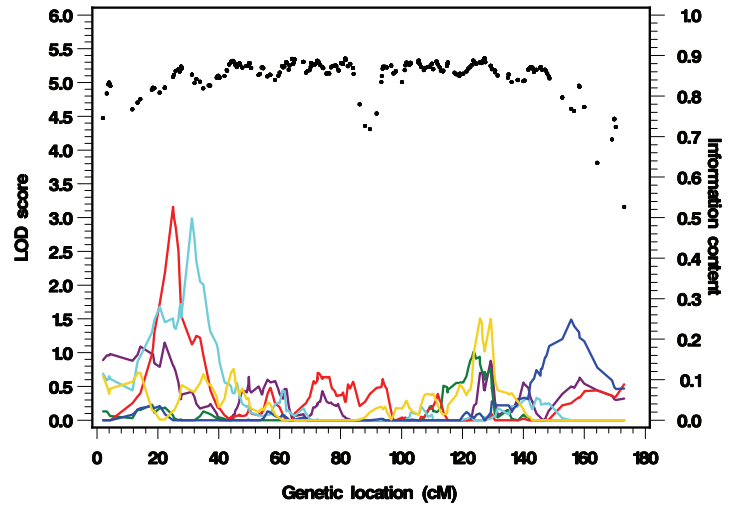

Chromosome 11

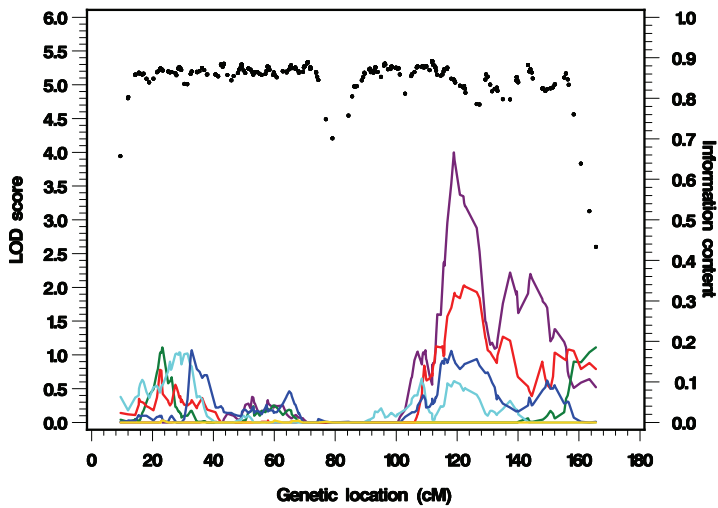

Chromosome 12

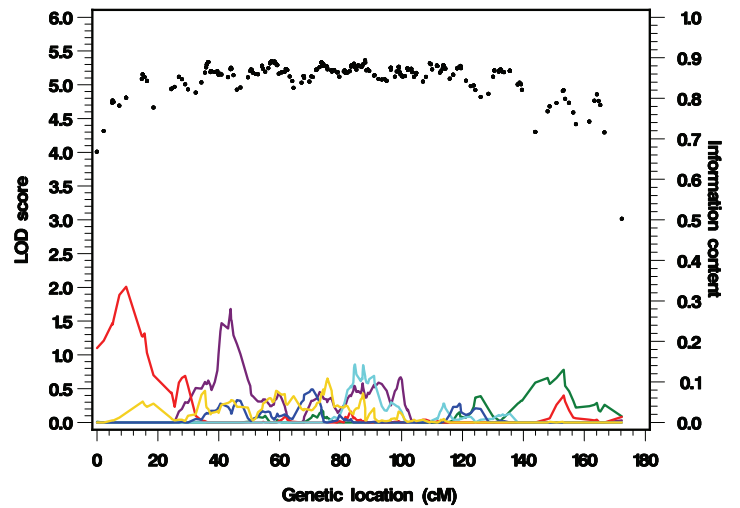

Chromosome 13

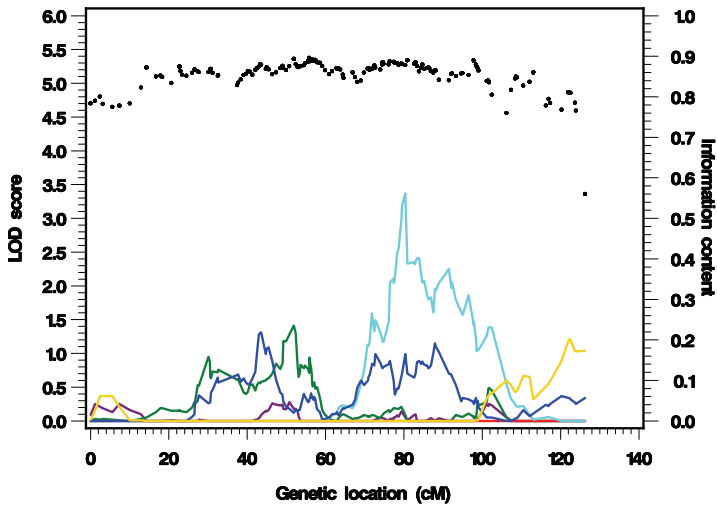

Chromosome 14

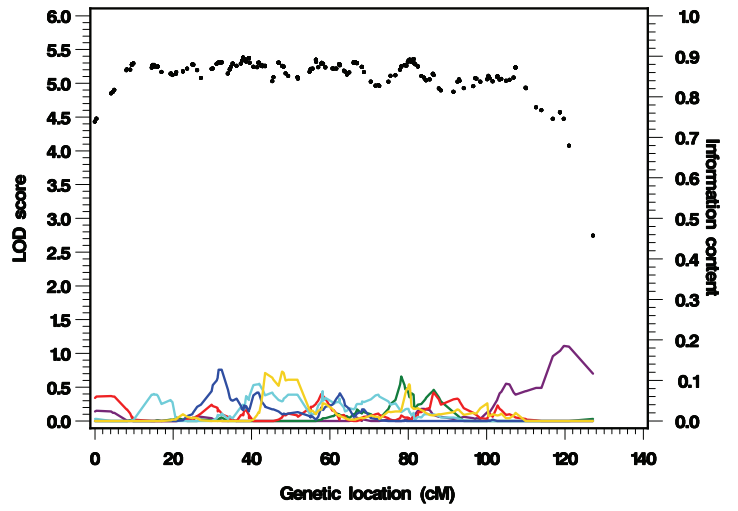

Chromosome 15

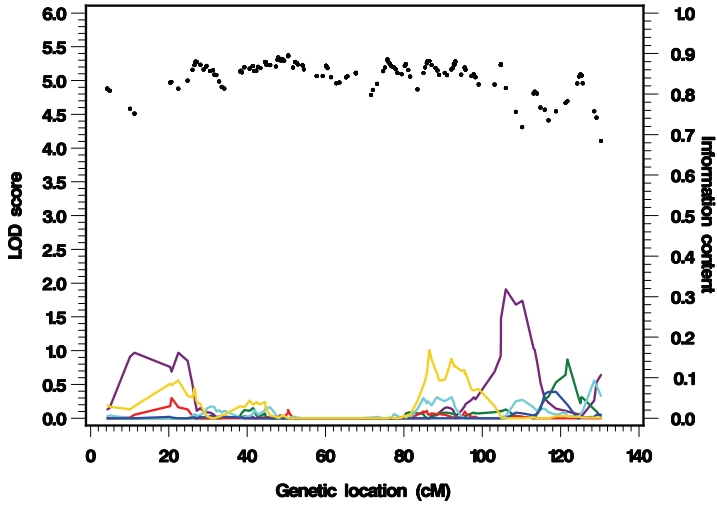

Chromosome 16

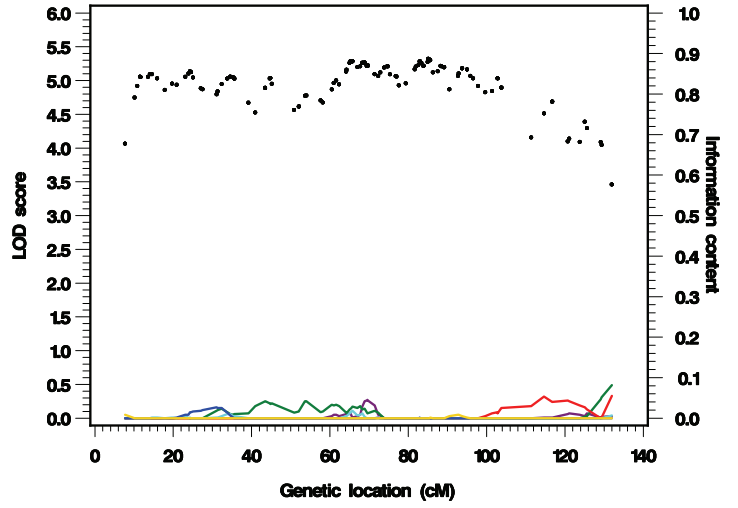

Chromosome 17

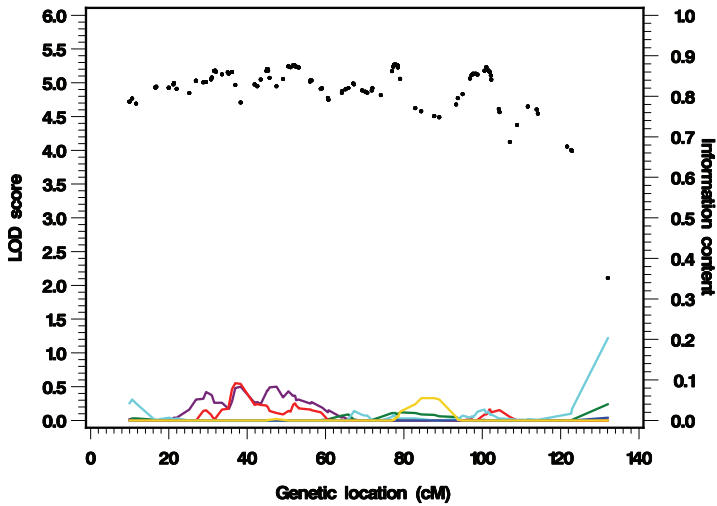

Chromosome 18

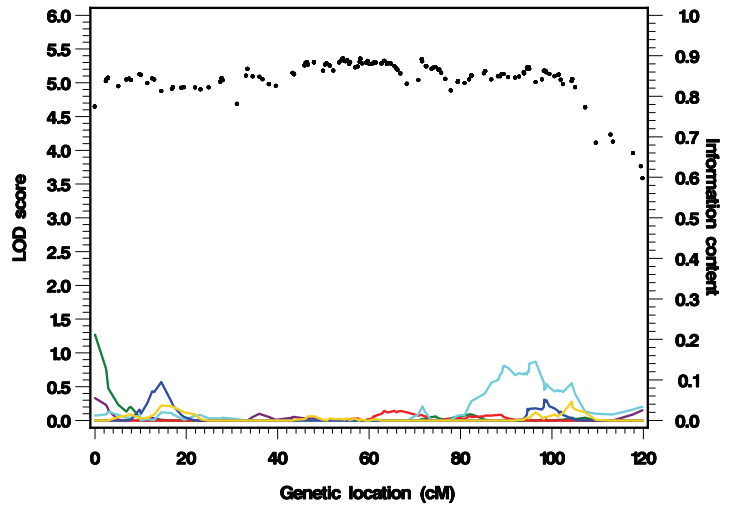

Chromosome 19

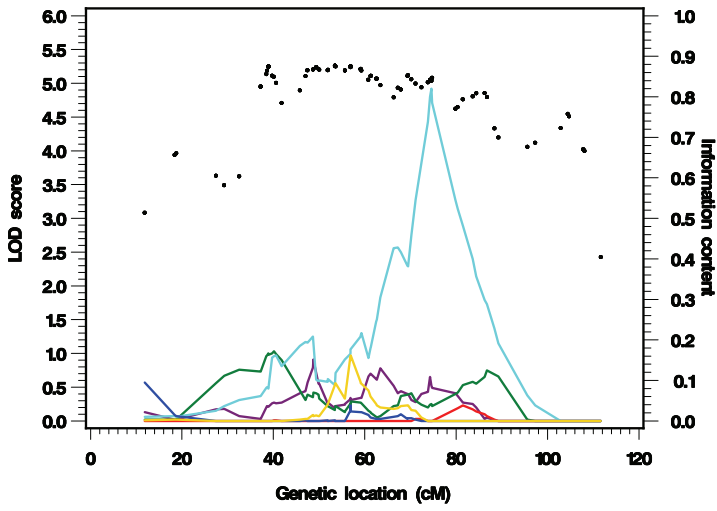

Chromosome 20

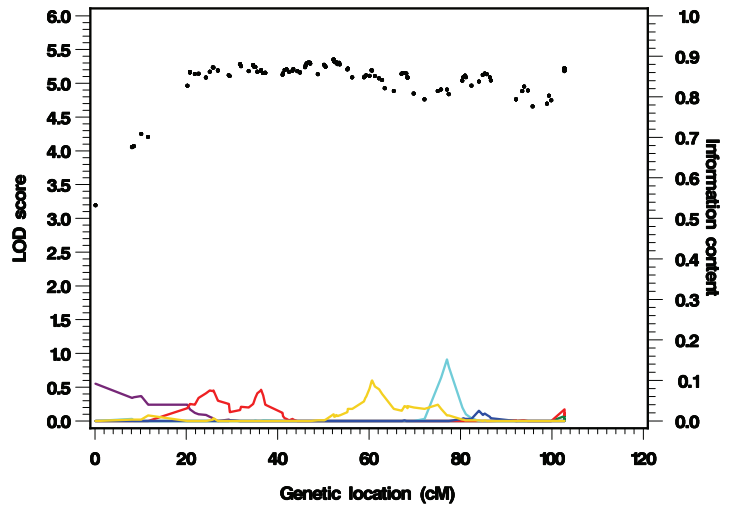

Chromosome 21

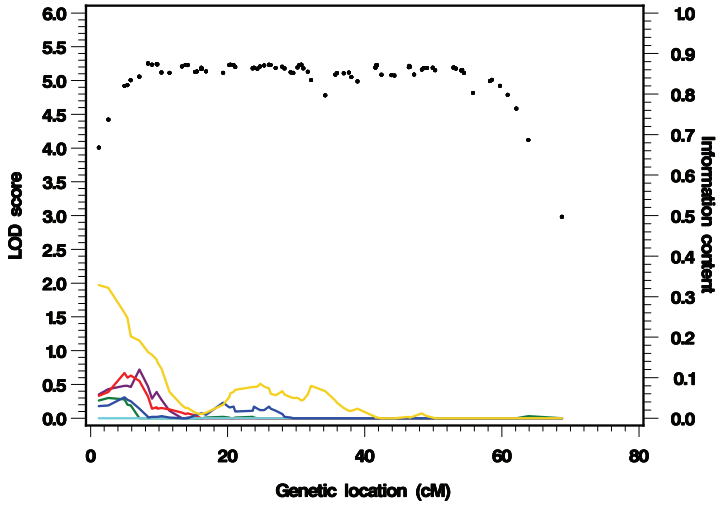

Chromosome 22

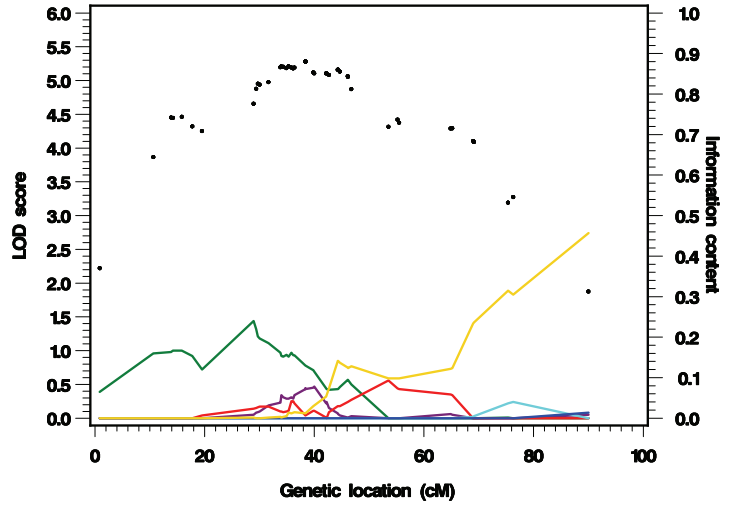

Chromosome X

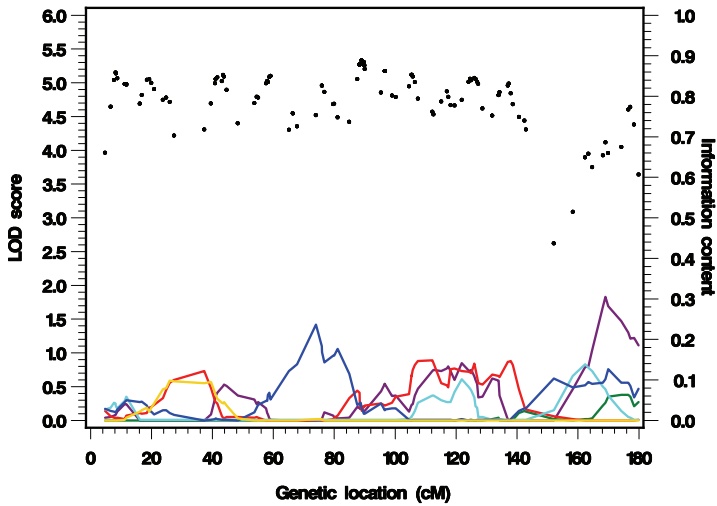

Supplement: NIHMS402817-supplement-Supp_Fig_1.pdf [file NIHMS402817-supplement-Supp_Fig_1.pdf]
